# Supplementary material for: The Impact of Resveratrol-Enriched Bread on Cardiac Remodeling in a Preclinical Model of Diabetes
Source: MDPI journal article supplement (doi:10.3390/antiox12051066), 2023-05-09
Supplement: s1 [file s1]

# The Impact of Resveratrol-Enriched Bread on Cardiac Remodeling in a Preclinical Model of Diabetes

## 1. Experimental groups identification

Forty-eight outbred wild male Sprague-Dawley rats with three weeks old were randomly divided into four groups, represented in the Table S1, and stayed one week for acclimatization with standard diet and further fed with bread diet up to the third week of the experiment (Figure S1).

**Table S1.** Animals group and respective treatment of experimental protocol.

| Treatment                         | Group name |
|-----------------------------------|------------|
| Control + Bread                   | CB         |
| Control + Bread + RSV (10 mg/Kg)  | CBR        |
| Diabetes + Bread                  | DB         |
| Diabetes + Bread + RSV (10 mg/Kg) | DBR        |

## 2. Animals' groups monitorization on anthropometric and welfare parameters along experiment

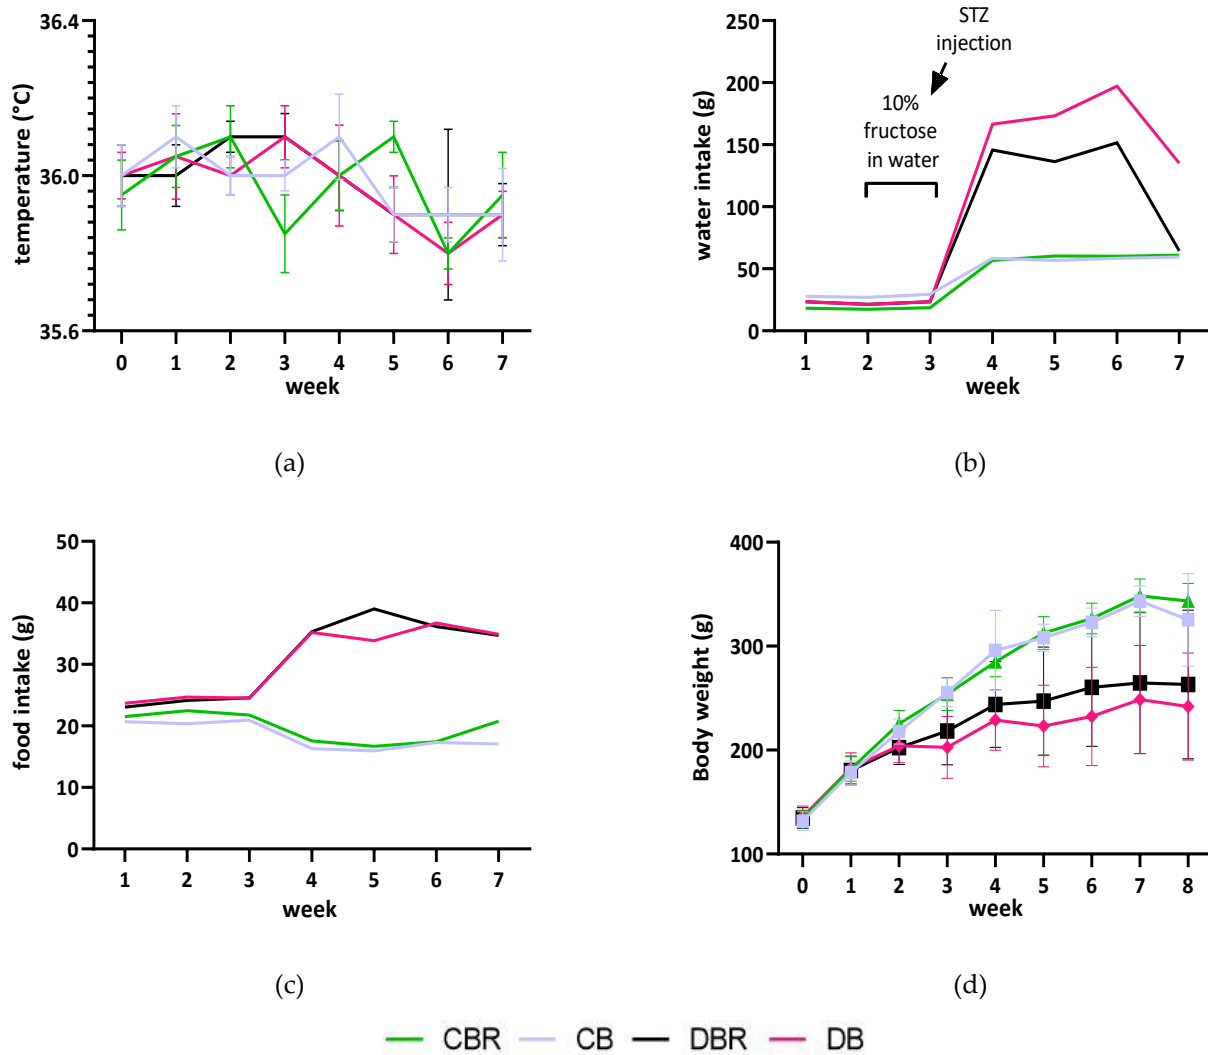

**Figure S1.** Weekly parameters of animal's housing conditions: temperature (a), water (b) and food intake (c) and body weight (d). Body weight at week 8 corresponds to the day of the necropsy. CB is the control group fed with plain bread (n = 8), and CBR is the group fed bread with 10 mg/kg of RSV a day (n = 8); DB is the fructose/STZ group fed with plain bread (n = 15), and DBR is the one fed with bread containing 10 mg/kg of RSV a day (n = 16).

**Table S2.** Humane Endpoints applied to evaluate animal welfare in a fructose/STZ-induced diabetes rat model.

| Score                             |                               | 0      | 1                                            | 2                                                             | 3                                         |
|-----------------------------------|-------------------------------|--------|----------------------------------------------|---------------------------------------------------------------|-------------------------------------------|
| Body Condition / Weight           |                               | Normal | Altered body condition / weight loss of <10% | Emaciated / weight loss of 10-20%                             | Weight loss of > 20% (Euthanasia)         |
| Posture                           |                               | Normal | Curved                                       | ---                                                           | ---                                       |
| Hair/tail appearance and grooming |                               | Normal | Lack of grooming                             | Very bad looking hair, dirty tail, severe chro-modachryorrhea |                                           |
| Grimace scale                     | Eyes and ex-tremities         | Normal | Narrowing of the orbital area                | Moderate anemia/Cata-racts, Eyes fully closed                 | Severe anemia/Corneal ulcers (Euthanasia) |
|                                   | Position of ears and whiskers | Normal | Dropped ears, forward whiskers (Stiffened)   | Floppy and curved ears, whiskers turned                       | ---                                       |

|                                                        |         |                                               |                                             |                                                    |
|--------------------------------------------------------|---------|-----------------------------------------------|---------------------------------------------|----------------------------------------------------|
|                                                        |         |                                               | forward and crumpled<br>(clusters)          |                                                    |
| Nose/cheeks                                            | Normal  | Flattening and elongating the tip of the nose | Flattening of the cheeks (cheek appearance) | ---                                                |
| Walk                                                   | Normal  | ---                                           | ---                                         | Walking on the tip of the extremities (Euthanasia) |
| Skin                                                   | Absence | Skin injuries/infections < 5mm                | Skin injuries/infections > 5mm              | Presence of necrosis (Euthanasia)                  |
| Mental status                                          | Normal  | Inactive                                      | Moribund                                    | Stupor/coma (Euthanasia)                           |
| Response to external stimuli                           | Normal  | Moderate                                      | Moderate with vocalization                  | Violent                                            |
| Hydration status                                       | Normal  | Abnormal skin pinch test (> 2 sec)            | ---                                         | ---                                                |
| Stool appearance                                       | Solid   | Pasty diarrhea                                | Liquid diarrhea                             | ---                                                |
| Convulsions                                            | Absence | ---                                           | ---                                         | Presence                                           |
| Visualization and response to mild abdominal palpation | Normal  | Vocalization                                  | Distended                                   | ---                                                |

Recommendation: If an animal's total score was 4 or higher or a score of 3 in some parameters, such as body weight, it was re-evaluated to decide if it should be removed from the protocol.

### 3. Glycaemia monitorization along animal experiment

Glucose measures were taken at week 4 of experiment, before the introduction of the diet with bread and two and four weeks later to evaluate diabetes development (Figure S2.a-b). The feeding glucose levels of both control groups with values lower than 200 mg/dL was due to its efficient response to keep glucose homeostasis. Fasting glucose levels were lower than 200 mg/dL in fructose/STZ animals.

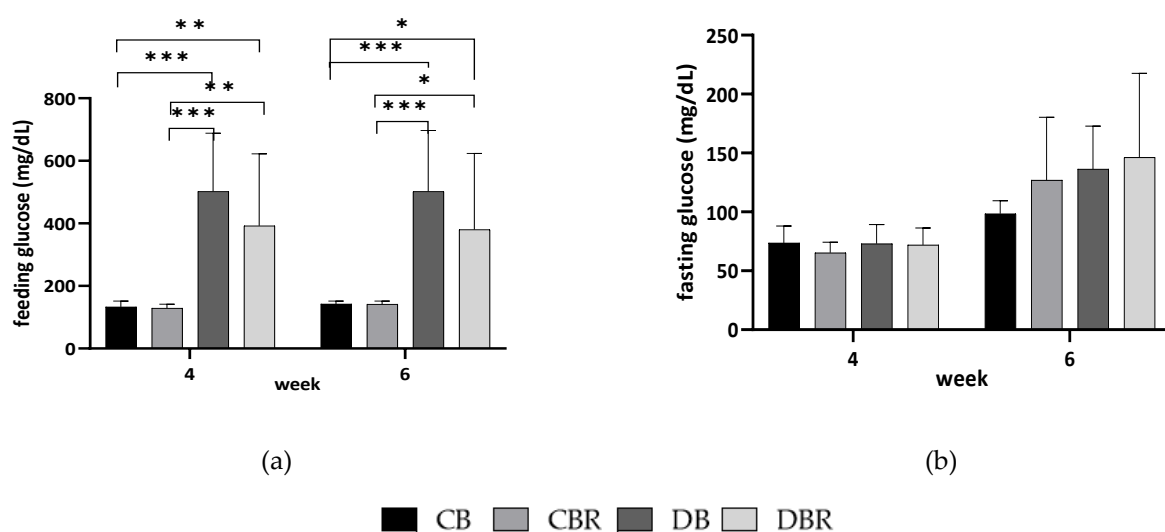

**Figure S2.** Circulating glucose levels after feeding (a) and fasting (b) moments of Sprague-Dawley rats in the final of the experiment. Values represent mean  $\pm$  standard deviation (\*  $p < 0.05$ , \*\*  $p < 0.01$  and \*\*\*  $p < 0.001$ ). CB is the control group fed with plain bread ( $n = 8$ ), and CBR is the group fed bread with 10 mg/kg of RSV a day ( $n = 8$ ); DB is the fructose/STZ group fed with plain bread ( $n = 15$ ), and DBR is the one fed with bread containing 10 mg/kg of RSV a day ( $n = 16$ ).

#### 4. Echocardiogram parameters for evaluating cardiac function

**Table S3.** All echocardiogram parameters of animal experiment.

|                                | Groups of Treatment |              |              |               |
|--------------------------------|---------------------|--------------|--------------|---------------|
|                                | CB                  | CBR          | DB           | DBR           |
| BSA (cm <sup>2</sup> )         | 429.6± 41.2         | 446.0± 14.8  | 328.2 ± 22.6 | 359.6 ± 77.9  |
| IVS <sub>d</sub> (mm)          | 1.12 ± 0.18         | 1.21 ± 0.20  | 0.97 ± 0.17  | 1.40 ± 0.26   |
| LV <sub>d</sub>                | 7.28 ± 0.99         | 7.46 ± 0.74  | 7.73 ± 1.05  | 7.01 ± 1.39   |
| LVPW <sub>d</sub> (mm)         | 1.11 ± 0.18         | 1.29 ± 0.29  | 0.99 ± 0.16  | 1.51 ± 0.34   |
| IVS <sub>s</sub> (mm)          | 1.17 ± 0.23         | 1.17 ± 0.18  | 0.96 ± 0.17  | 1.47 ± 0.24   |
| LV <sub>s</sub> (mm)           | 6.84 ± 1.20         | 6.55 ± 0.50  | 7.07 ± 1.08  | 6.01 ± 1.44   |
| LVPW <sub>s</sub> (mm)         | 1.21 ± 0.19         | 1.21 ± 0.24  | 0.93 ± 0.21  | 1.65 ± 0.38   |
| Ao <sub>d</sub> (cm)           | 0.28 ± 0.04         | 0.30 ± 0.03  | 0.31 ± 0.03  | 0.28 ± 0.05   |
| Ao VTI (cm)                    | 3.94 ± 0.86         | 5.23 ± 1.20  | 4.30 ± 0.82  | 3.81 ± 1.21   |
| HR (bpm or min <sup>-1</sup> ) | 321.3 ± 25.8        | 272.5 ± 37.9 | 190.0 ± 36.7 | 217.5 ± 67.3  |
| LV ET (s)                      | 82.9 ± 8.37         | 93.9 ± 18.3  | 125.8 ± 18.5 | 108.9 ± 20.0  |
| E (cm/s)                       | 0.68 ± 0.12         | 0.81 ± 0.11  | 0.60 ± 0.19  | 0.58 ± 0.17   |
| A (cm/s)                       | 0.43 ± 0.10         | 0.38 ± 0.15  | 0.39 ± 0.12  | 0.31 ± 0.07   |
| AE (cm <sup>2</sup> )          | 13.6 ± 3.9          | 12.0 ± 2.8   | 10.1 ± 3.5   | 10.8 ± 3.3    |
| LV mass (mm)                   | 0.50 ± 0.10         | 0.60 ± 0.13  | 0.48 ± 0.12  | 0.73 ± 0.25   |
| FS (%)                         | 6.69 ± 3.30         | 15.4 ± 7.4   | 11.2 ± 4.76  | 13.4 ± 6.9    |
| SV (mL)                        | 1.12 ± 0.30         | 1.56 ± 0.37  | 1.36 ± 0.22  | 1.10 ± 0.45   |
| CO (mL/min)                    | 357.6 ± 98.1        | 420.6 ± 98.2 | 241.2 ± 39.9 | 251.7 ± 142.7 |
| E/A                            | 1.64 ± 0.29         | 2.47 ± 1.01  | 1.57 ± 0.21  | 1.90 ± 0.49   |
| EF (%)                         | 20.1 ± 10.1         | 38.3 ± 14.7  | 27.9 ± 11.3  | 37.6 ± 17.1   |
| TAPSE (mm)                     | 0.19 ± 0.04         | 0.26 ± 0.04  | 0.22 ± 0.05  | 0.16 ± 0.06   |
| VTI AP (cm)                    | 2.96 ± 0.84         | 3.67 ± 0.93  | 3.67 ± 2.19  | 3.72 ± 1.27   |
| Pulmonary artery diameter (cm) | 0.21 ± 0.04         | 0.21 ± 0.03  | 0.20 ± 0.03  | 0.19 ± 0.03   |
| PAAT (ms)                      | 31.3 ± 6.73         | 32.1 ± 7.2   | 29.5 ± 9.0   | 28.6 ± 4.09   |
| SV                             | 0.62 ± 0.22         | 0.78 ± 0.23  | 0.74 ± 0.51  | 0.73 ± 0.30   |
| CO                             | 195.7 ± 62.5        | 207.2 ± 51.0 | 137.1± 87.9  | 161.8 ± 89.9  |
| AD (cm <sup>2</sup> )          | 14.1 ± 4.1          | 12.4 ± 2.9   | 10.2 ± 1.8   | 10.6 ± 2.9    |
| D1                             | 5.50 ± 0.58         | 5.80 ± 0.65  | 5.66 ± 1.11  | 5.74 ± 0.98   |
| D2                             | 5.78 ± 0.55         | 5.29 ± 0.55  | 4.78 ± 0.89  | 5.21 ± 0.84   |
| Eccentricity index (D1/D2)     | 0.96 ± 0.15         | 1.07 ± 0.14  | 1.20 ± 0.22  | 1.10 ± 0.12   |

Values are means ± standard deviation of n animals in each group. In each line, d in subscript means diastole and s in subscript means systole; BSA - body surface area; IVS - intraventricular septum thickness; LV - left ventricle; LVPW - left ventricular posterior wall thickness; Ao - aorta; Ao VTI - aortic velocity time integral; HR - heart rate; LV ET - left ventricular ejection time; E - peak early diastolic transmitral flow velocity; A - peak late transmitral flow velocity; AE – area of left atrium; FS - fractional shortening; SV - stroke volume; CO - cardiac output; EF - ejection fraction; TAPSE -

tricuspid annular plane systolic excursion; VTI AP - pulmonary velocity time integral; PAAT - pulmonary artery acceleration time; SV – stroke volume; CO – cardiac output; AD - area of right atrium; D1 and D2 - length of two perpendicular minor-axis of the left ventricle. CB is the control group fed with plain bread (n = 8), and CBR is the group fed bread with 10 mg/kg of RSV a day (n = 8); DB is the fructose/STZ group fed with plain bread (n = 7), and DBR is the one fed with bread containing 10 mg/kg of RSV a day (n = 8).

## 5. Antibodies information

**Table S4.** Specification of the dilutions and catalog number for each primary antibody.

| Primary antibody | Catalog number | Dilution used | Molecular weight of target protein (kDa) | Western blot | Slot blot |
|------------------|----------------|---------------|------------------------------------------|--------------|-----------|
| CRP              | ab65842        | 1:1000        | -                                        |              | X         |
| ATP $\beta$      | ab14730        | 1:1000        | 52                                       | X            |           |
| PFKM             | ab154804       | 1:1000        | 85                                       | X            |           |
| CEBP $\beta$     | ab32358        | 1:1000        | 36                                       | X            |           |
| CITED4           | mbs833529      | 1:1000        | 17                                       | X            |           |
| Cx43             | ab11370        | 1:1000        | 43                                       | X            |           |
| SIRT3            | 26275          | 1:1000        | 28                                       | X            |           |
| GLUT4            | ab48547        | 1:1000        | 30                                       | X            |           |
| MnSOD            | ab13533        | 1:1000        | 25                                       | X            |           |
| ETFDH            | ab91505        | 1:1000        | 69                                       | X            |           |
| DNP              | MAB2223        | 1:1000        | -                                        | X            | X         |
| nitroTyr         | MAB5404        | 1:1000        | -                                        |              | X         |
